# Supplementary material for: Grease trap waste valorization through hydrothermal liquefaction and anaerobic digestion: a circular approach to dairy wastewater treatment
Source: Royal Society of Chemistry journal article supplement (doi:10.1039/d4ee02245a), 2024-01-01
Supplement: d4ee02245a1.pdf [file d4ee02245a1.pdf]

# **Grease trap waste valorization through hydrothermal liquefaction and anaerobic digestion: a circular approach to dairy wastewater treatment**

Daniela V. Cabrera<sup>a</sup>, Ingrid Adema-Yusta<sup>a</sup>, María J. Santibañez<sup>a</sup>, Crispin Celis<sup>b</sup>, Jefferson W. Tester<sup>c,d</sup>, Rodrigo A. Labatut<sup>a\*</sup>

<sup>a</sup> Department of Hydraulic and Environmental Engineering, Pontificia Universidad Católica de Chile, Santiago, Chile

<sup>b</sup> Chemistry Department, Science Faculty, Pontificia Universidad Javeriana, Bogotá, Colombia

<sup>c</sup> Smith School of Chemical and Biomolecular Engineering, Cornell University, Ithaca, NY 14853, USA

<sup>d</sup> Energy Systems Institute, Cornell University, Ithaca, NY 14853, USA

## **List of contents**

### **Analytical procedure details**

**Table S1.** Experimental design of HTL runs

**Table S2.** Composition of the nutrient media solution used in the BMP tests

**Table S3.** Preparation of the anaerobic toxicity assay (ATA)

**Table S4.** Operational phases of the EGSB reactor

**Table S5.** Physicochemical characteristics of the grease trap grease

**Table S6.** Major compounds identified in the APs generated from the HTL of grease trap waste

**Table S7.** Major compounds identified in the biocrudes generated from the HTL of grease trap waste

**Table S8.** Elemental analyses of the GTW and hydrochar samples obtained in this study

**Table S9.** Physicochemical characterization of the BMP digestate after treating aqueous phases

**Table S10.** Kinetic parameters of the modified Gompertz model for the different AP samples

**Figure S1.** Diagram of the bench scale EGSB reactor used in this study

**Figure S2.** TGA analysis of the grease trap waste and biocrudes

**Figure S3.** Concentration of volatile fatty acids (g COD L<sup>-1</sup>) characterized in the different APs

**Figure S4.** Cumulative methane production (mL) at increasing AP concentrations (i.e., 8, 16, 24, 32, and 48% v/v) following anaerobic toxicity assays (ATA)

## **Analytical procedure details**

The elemental composition (CHN) of GTW, biocrude, and hydrochar was determined using an Exeter Analytical CE-440 CHN/O Analyzer. The oxygen content was calculated by subtraction of the CHN and ash contents, with the latter measured by combustion of the sample at 550 °C to constant weight (APHA-2540E).<sup>1</sup> Total organic carbon (TOC) and total nitrogen (TN) concentrations (mg/L) in the AP were analyzed following the catalytic oxidation method at 720 °C using integrated Shimadzu TOC-L and TNM-L modules.

The organic constituents of the biocrude and the AP were identified by GC-MS, using an Agilent 6850 Series II GC coupled to an Agilent 5875B mass detector and an HP-Innowax capillary column. Compounds were identified by matching fragmentation patterns against NIST14 database.

The boiling point distribution of GTW and biocrudes was determined by thermogravimetric analysis (TGA) using a TA Instruments QA500.

The functional groups of hydrochars were characterized by fourier transform infrared (FTIR) analysis using a Thermo Scientific Nicolet iZ10 FTIR spectrometer.

The concentration of COD, Volatile fatty acids (VFAs), and total ammonia nitrogen (TAN), and pH were measured in the APs, BMP liquid phase, and influent and effluent of the EGSB reactor. To measure VFA concentrations, the liquids were acidified with 2% formic acid and measured by GC using a flame ionization detector (Agilent, USA) and a DB-FFAP capillary column (Agilent, USA). TAN was measured using an ion-selective electrode (HACH, USA) and pH was measured using a pH electrode (Thermo Electron Corporation, Singapore). Total organic nitrogen (TON) was estimated as the difference between TN and TAN, assuming that the presence of nitrates was negligible.

**Table S1.** Experimental design of HTL runs.

| # | HTL Reaction | Reaction medium | Products |      |      |
|---|--------------|-----------------|----------|------|------|
| 1 | R-0          | DI              | B-0      | AP-0 | HC-0 |
| 2 | R-1          | AP-0            | B-1      | AP-1 | HC-1 |
| 3 | R-2          | AP-1            | B-2      | AP-2 | HC-2 |
| 4 | R-3          | AP-2            | B-3      | AP-3 | HC-3 |
| 5 | R-4          | AP-3            | B-4      | AP-4 | HC-4 |
| 6 | R-5          | AP-4            | B-5      | AP-5 | HC-5 |

**Table S2.** Composition of the nutrient media solution used in the BMP tests. Developed by Labatut et al.,<sup>2</sup> based on Owen et al.,<sup>3</sup> Angelidaki et al.,<sup>4</sup> and Speece et al.<sup>5</sup>

| Basal medium                                       | Concentration in each BMP bottle (mg/L) |
|----------------------------------------------------|-----------------------------------------|
| NH <sub>4</sub> Cl                                 | 200                                     |
| KCl                                                | 100.0                                   |
| MgCl <sub>2</sub> 6H <sub>2</sub> O                | 600.0                                   |
| KH <sub>2</sub> PO <sub>4</sub>                    | 138.0                                   |
| K <sub>2</sub> HPO <sub>4</sub>                    | 176.0                                   |
| <b>Vitamins</b>                                    |                                         |
| Yeast extract                                      | 100                                     |
| <b>Trace elements</b>                              |                                         |
| FeCl <sub>3</sub> 6H <sub>2</sub> O                | 200.0                                   |
| MnCl <sub>2</sub> 4H <sub>2</sub> O                | 4.0                                     |
| CoCl <sub>2</sub> 6H <sub>2</sub> O                | 10.0                                    |
| NiCl <sub>2</sub> 6H <sub>2</sub> O                | 10.0                                    |
| ZnCl <sub>2</sub> 2H <sub>2</sub> O                | 0.5                                     |
| Na <sub>2</sub> SeO <sub>3</sub>                   | 0.1                                     |
| Na <sub>2</sub> MoO <sub>4</sub> 2H <sub>2</sub> O | 0.5                                     |
| CaCl <sub>2</sub> 2H <sub>2</sub> O                | 100.0                                   |
| CuCl <sub>2</sub> 2H <sub>2</sub> O                | 0.5                                     |
| KI                                                 | 10.0                                    |
| H <sub>3</sub> BO <sub>3</sub>                     | 0.5                                     |
| <b>Others</b>                                      |                                         |
| Resazurin                                          | 1.0                                     |
| Na <sub>2</sub> S 9H <sub>2</sub> O                | 100.0                                   |
| NaHCO <sub>3</sub> *                               | 4200                                    |

**Table S3.** Preparation of the anaerobic toxicity assay (ATA) for AP concentration volumes from 0 to 40%

|                                 | Control | A (8%) | B (16%) | C (24%) | D (32%) | E (40%) | Blank |
|---------------------------------|---------|--------|---------|---------|---------|---------|-------|
| AP concentration volume (%)     | -       | 8      | 16      | 24      | 32      | 40      | -     |
| AP (mL)                         | 0       | 4      | 8       | 12      | 16      | 20      | 0     |
| Mass COD from AP (mg)           | 0       | 19     | 38      | 57      | 76      | 95      | 0     |
| COD concentration from AP (g/L) | 0       | 0.38   | 0.76    | 1.14    | 1.52    | 1.90    | 0     |
| Standard feedstock (mL)         | 2       | 2      | 2       | 2       | 2       | 2       | -     |
| Inoculum (mL)                   | 10      | 10     | 10      | 10      | 10      | 10      | 10    |
| Nutrient solution (mL)          | 0.5     | 0.5    | 0.5     | 0.5     | 0.5     | 0.5     | 0.5   |
| Distilled water (mL)            | 37.5    | 33.5   | 29.5    | 25.5    | 21.5    | 17.5    | 39.5  |
| Final vol. (mL)                 | 50      | 50     | 50      | 50      | 50      | 50      | 50    |
| Inhibition (%)*                 | -       | - 8%   | - 11%   | - 12%   | 5%      | 7%      | -     |

\*A negative value implies that the substrate at that concentration enhances biomethane production.

**Table S4.** Operational phases of the EGSB reactor

| Phase                                                      | I      | II      | III     | IV      | V       | VI      | VII     |
|------------------------------------------------------------|--------|---------|---------|---------|---------|---------|---------|
| Days                                                       | 1 – 28 | 29 – 36 | 37 – 40 | 41 – 43 | 44 – 46 | 47 – 49 | 50 – 53 |
| OLR (g COD L <sup>-1</sup> d <sup>-1</sup> )               | 3      | 3       | 3       | 3       | 3       | 3       | 3       |
| AP concentration (g COD L <sup>-1</sup> ) <sup>a</sup>     | 0.0    | 0.4     | 0.8     | 1.2     | 1.6     | 2.0     | 2.0     |
| Synthetic substrate concentration (g COD L <sup>-1</sup> ) | 2.0    | 1.6     | 1.2     | 0.8     | 0.4     | 0.0     | 0.0     |
| Total concentration (g COD L <sup>-1</sup> )               | 2.0    | 2.0     | 2.0     | 2.0     | 2.0     | 2.0     | 2.0     |

<sup>a</sup> AP-0 was used in Phases II to VI, while AP-R was used in Phase VII.

**Table S5.** Physicochemical characteristics of the grease trap grease

| Proximate analysis<br>(wt%)                                   |             | Chemical composition analysis<br>(wt%, daf)     |                               |                                                 | Elemental analysis<br>(wt%, daf) |        |      |                |
|---------------------------------------------------------------|-------------|-------------------------------------------------|-------------------------------|-------------------------------------------------|----------------------------------|--------|------|----------------|
| TS                                                            | Ash<br>(db) | Crude fat <sup>a</sup>                          | Crude protein<br><sup>a</sup> | Total<br>carbohydrate <sup>b</sup>              | C                                | H      | N    | O <sup>b</sup> |
| 48.06 ± 0.02                                                  | 2.89 ± 0.13 | 76.60                                           | 9.43                          | 13.97                                           | 67.2                             | 11.0   | 3.3  | 15.6           |
| Saturated fats <sup>c</sup><br>(wt%, daf)                     |             | Monounsaturated fats <sup>c</sup><br>(wt%, daf) |                               | Polyunsaturated fats <sup>c</sup><br>(wt%, daf) |                                  |        |      |                |
| 47.68                                                         |             | 24.32                                           |                               | 4.60                                            |                                  |        |      |                |
| Inorganic composition (mg kg <sup>-1</sup> , db) <sup>d</sup> |             |                                                 |                               |                                                 |                                  |        |      |                |
| As                                                            | Cd          | Cu                                              | Sn                            | Fe                                              | Pb                               | Se     | Zn   |                |
| < 0.08                                                        | < 0.02      | 5.6                                             | < 0.1                         | 556.3                                           | 5.9                              | < 0.05 | 16.8 |                |

TS: total solids; db: dry basis; daf: dry and ash-free basis.

<sup>a</sup> Fat and protein content analyses were performed at an external laboratory (Dictuc S.A., Chile), following the AOAC 989.05 and AOAC 2001.11 methods, respectively.

<sup>b</sup> Calculated by difference

<sup>c</sup> Lipid composition was performed at an external laboratory (Dictuc S.A., Chile), following the ISO 5509/ISO 15304 GC-FID FAME Analysis method

<sup>d</sup> Metals determination was carried out at an external laboratory (Dictuc S.A., Chile) according to Standard Methods 3030 C, E (2005) and Standard Methods 3120 B (2005). Preparation and digestion were based on AOAC 985.35 (2012).

**Table S6.** Major compounds identified\* in the APs generated from the HTL of grease trap waste.

| RT (min) | Compound                             | Aqueous Phase (Area, %) |       |       |       |      |       |
|----------|--------------------------------------|-------------------------|-------|-------|-------|------|-------|
|          |                                      | AP-0 <sup>a</sup>       | AP-1  | AP-2  | AP-3  | AP-4 | AP-5  |
| 13.956   | 2,6-Lutidine                         | -                       | -     | -     | -     | 0.1  | -     |
| 15.565   | Pyridine, 3-methyl-                  | -                       | -     | 0.69  | 0.39  | 0.41 | 0.88  |
| 16.529   | 2-Propanone, 1-hydroxy-              | 0.2                     | 0.3   | 0.29  | -     | -    | 0.3   |
| 16.829   | Pyridine, 2,3-dimethyl-              | -                       | -     | -     | -     | 0.2  | -     |
| 16.838   | 1 Pyridine, 2,3-dimethyl-            | -                       | -     | -     | 0.2   | -    | -     |
| 17.095   | 1 Pyridine, 2,4,6-trimethyl-         | -                       | -     | -     | 0.25  | -    | -     |
| 17.104   | Pyridine, 3,5-dimethyl-              | -                       | -     | -     | -     | -    | 0.19  |
| 17.514   | Pyridine, 4-ethyl-                   | -                       | -     | -     | -     | -    | 0.36  |
| 17.667   | Benzenamine, 3,5-dimethyl-           | 0.18                    | -     | -     | -     | -    | -     |
| 17.711   | Pyridine, 2,4,6-trimethyl-           | -                       | 0.4   | 0.26  | -     | 0.72 | 0.28  |
| 17.960   | Benzenamine, 2,4-dimethyl-           | -                       | -     | -     | -     | -    | 0.16  |
| 18.951   | Acetic acid                          | 21.52                   | 11.89 | 14.92 | 14.61 | 15.6 | 13.08 |
| 19.527   | Benzenamine, 2,4,6-trimethyl-        | -                       | -     | 0.51  | -     | -    | -     |
| 20.315   | Formic acid                          | -                       | 0.28  | -     | -     | -    | -     |
| 20.974   | Propanoic acid                       | 1.75                    | 1.7   | 2.05  | 1.9   | 2.1  | 1.75  |
| 21.975   | Benzenamine, 2-cyclopropyl-          | -                       | -     | 0.2   | -     | -    | -     |
| 22.994   | Butanoic acid                        | 2.63                    | 3.2   | 3.66  | 3.63  | 3.91 | 2.55  |
| 23.266   | Butyrolactone                        | -                       | -     | 0.78  | -     | -    | -     |
| 23.294   | Butanoic acid, 4-hydroxy-            | -                       | 0.45  | -     | 0.44  | 0.67 | 0.48  |
| 25.449   | Pentanoic acid                       | -                       | -     | -     | -     | 0.16 | -     |
| 25.780   | 1H-Pyrrole, 2,3,4,5-tetramethyl-     | 0.15                    | 1.06  | 0.41  | 0.21  | 0.46 | 0.52  |
| 26.174   | Acetamide                            | -                       | -     | -     | 0.3   | 0.43 | -     |
| 26.847   | Benzenamine, 4-methoxy-N-methyl-     | -                       | 0.08  | -     | -     | -    | -     |
| 27.047   | 1H-Pyrrole, 3-ethyl-2,4,5-trimethyl- | -                       | -     | 0.34  | -     | -    | 0.54  |
| 28.509   | Piperidine, 1-methyl-                | -                       | -     | -     | 0.21  | -    | -     |
| 28.677   | 2,5-Pyrrolidinedione, 1-ethyl-       | -                       | -     | 0.24  | 0.86  | 0.92 | 0.44  |
| 28.882   | Butanamide                           | -                       | -     | -     | 0.22  | 0.22 | -     |
| 29.315   | 2,5-Pyrrolidinedione, 1-methyl-      | 0.71                    | -     | 1.31  | -     | 1.94 | -     |
| 29.861   | Pyrrolidine, 1-methyl-               | -                       | -     | 0.97  | -     | -    | -     |
| 30.028   | Quinoline                            | -                       | -     | 0.91  | -     | -    | -     |
| 30.038   | 2-Propenenitrile, 3-phenyl-, (E)-    | -                       | -     | -     | -     | -    | 0.55  |
| 31.122   | Phenol                               | -                       | 0.26  | -     | 0.35  | -    | -     |
| -31.884  | 2-Pyrrolidinone                      | 4.67                    | 3.27  | 6.21  | 4.84  | 5.07 | 4.65  |
| 32.393   | 1,2-Propanediol                      | 0.96                    | 0.91  | 1.37  | 2.78  | 2.52 | 2.29  |
| 33.584   | Quinoline, 4-methyl-                 | 0.58                    | 0.25  | 0.52  | 0.41  | 0.29 | 0.38  |
| 33.916   | 2-Piperidinone                       | 0.97                    | 0.34  | 0.72  | 1.69  | -    | -     |
| 34.679   | L-Lactic acid                        | -                       | -     | -     | 0.59  | -    | 0.89  |

|        |                                       |       |       |       |       |      |       |
|--------|---------------------------------------|-------|-------|-------|-------|------|-------|
| 34.929 | Caprolactam                           | 0.3   | 0.23  | 0.32  | 0.4   | -    | 0.23  |
| 35.874 | 2(1H)-Pyridinone, 1,3-dimethyl-       | -     | -     | -     | -     | -    | 0.15  |
| 36.695 | 2(1H)-Pyridinone, 3,6-dimethyl-       | 0.63  | -     | -     | 1.73  | 1.4  | 0.32  |
| 36.797 | 3-Pyridinol, 2,6-dimethyl-            | -     | 1.25  | -     | -     | -    | -     |
| 37.076 | Glycerol                              | 28.38 | 19.27 | 29.01 | 27.66 | 25.1 | 24.77 |
| 37.390 | 2-Ethyl-6-methylpyridin-3-ol          | 0.86  | -     | -     | -     | -    | -     |
| 37.577 | 3-Pyridinol, 2-ethyl-6-methyl-        | -     | -     | -     | -     | -    | 0.68  |
| 37.617 | 5-Dimethylaminopyrimidine             | -     | -     | -     | 0.95  | 0.91 | -     |
| 38.642 | 2(1H)-Pyridinone, 5-methyl-           | 2.5   | 3.06  | -     | 4.39  | 0.31 | -     |
| 38.754 | 3-Pyridinol, 6-methyl-                | -     | -     | 5.58  | 0.39  | -    | 3.65  |
| 38.898 | 3-Pyridinol                           | 1.45  | 1.35  | 1.97  | -     | 1.71 | 1.74  |
| 38.930 | 4-Pyridinol                           | -     | -     | -     | 1.69  | -    | -     |
| 39.239 | Phenol, 3-amino-                      | -     | -     | -     | 0.24  | -    | 0.43  |
| 39.628 | Succinimide                           | 1.25  | 1.35  | 2.14  | 1.88  | 2.07 | 2.11  |
| 40.582 | Phenol, o-amino-                      | 0.36  | 0.23  | 0.28  | -     | 3.42 | 0.44  |
| 40.979 | Benzeneacetic acid                    | 0.81  | -     | -     | -     | -    | -     |
| 41.730 | Isosorbide                            | 0.33  | 0.38  | 0.47  | 0.46  | 0.39 | 0.4   |
| 43.686 | 3,6,9,12-Tetraoxatetradecan-1-ol      | 0.11  | -     | -     | -     | -    | -     |
| 45.373 | 15-Crown-5                            | 1.45  | -     | -     | -     | 0.33 | -     |
| 46.514 | Hexaethylene glycol                   | -     | 1.12  | -     | -     | -    | -     |
| 46.802 | 18-crown-6                            | -     | -     | -     | 0.14  | -    | -     |
| 46.875 | Hexaethylene glycol monododecyl ether | 1.41  | -     | -     | -     | -    | -     |
| 48.329 | Benzeneethanol, 4-hydroxy-            | 2.51  | 4.06  | 1.26  | 0.77  | 1.5  | 1.27  |
| 48.517 | Pentaethylene glycol                  | 0.33  | -     | -     | -     | -    | -     |
| 49.471 | 4-pyridinecarboxamide                 | 0.65  | -     | -     | -     | -    | -     |
| 49.550 | 9-crown-3                             | -     | -     | -     | -     | -    | 0.06  |

\* Compounds with match factor scores, between observed and reference mass spectrum, greater than or equal to 75% were assigned as identified compounds.

<sup>a</sup> The labeling rule is the “abbreviation of aqueous phase” + “recycle times”.

**Table S7.** Major compounds identified\* in the biocrudes generated from the HTL of grease trap waste.

| RT (min) | Compound                                   | Biocrude (Relative area, %) |       |       |       |       |       |
|----------|--------------------------------------------|-----------------------------|-------|-------|-------|-------|-------|
|          |                                            | B-0 <sup>a</sup>            | B-1   | B-2   | B-3   | B-4   | B-5   |
| 7.565    | Pentanoic acid                             | 0.11                        | -     | -     | -     | -     | -     |
| 9.477    | Pentanoic acid, 4-methyl-                  | 0.04                        | -     | -     | -     | -     | -     |
| 10.713   | Hexanoic acid                              | 0.4                         | 0.66  | 0.75  | 0.91  | 1.14  | 0.87  |
| 16.985   | Octanoic acid                              | 3.53                        | 4.8   | 4.23  | 4.65  | 5.14  | 3.59  |
| 22.688   | n-Decanoic acid                            | 5.6                         | 5.91  | 6.01  | 6.37  | 6.37  | 4.52  |
| 23.168   | Decanoic acid, ethyl ester                 | -                           | -     | -     | -     | -     | 0.24  |
| 26.641   | Dodecanoic acid, methyl ester              | 0.04                        | -     | -     | -     | -     | -     |
| 28.243   | Dodecanoic acid                            | 32.07                       | 41.48 | 39.47 | 43.21 | 43.79 | 31.34 |
| 28.418   | Undecanoic acid, ethyl ester               | 0.12                        | -     | -     | 0.34  | -     | 2.34  |
| 30.126   | Tridecanoic acid                           | 0.06                        | -     | -     | -     | -     | -     |
| 30.427   | Decanoic acid, 2-propenyl ester            | 0.18                        | 0.35  | 0.74  | 0.23  | -     | 0.44  |
| 30.744   | Dodecanoic acid, propyl ester              | 0.05                        | -     | -     | 0.22  | -     | -     |
| 30.867   | Cyclohexadecane                            | -                           | -     | -     | 0.23  | -     | -     |
| 32.749   | Tetradecanoic acid                         | 12.3                        | -     | -     | -     | -     | -     |
| 33.142   | Tetradecanoic acid, ethyl ester            | 0.06                        | -     | -     | -     | -     | -     |
| 34.08    | Pentadecanoic acid                         | 0.2                         | 20.06 | 25.2  | 29.2  | 23.36 | 18.08 |
| 36.011   | Hexadecanoic acid, methyl ester            | 0.16                        | 0.28  | -     | -     | 0.27  | -     |
| 37.285   | n-Hexadecanoic acid                        | 19.35                       | -     | -     | -     | -     | -     |
| 37.416   | Hexadecanoic acid, ethyl ester             | -                           | 0.36  | 0.24  | 0.42  | 0.3   | 6.56  |
| 37.418   | Pentadecanoic acid, ethyl ester            | -                           | -     | 0.31  | -     | -     | 1.62  |
| 37.425   | Hexadecanoic acid, 2-methyl-, methyl ester | 2.69                        | -     | -     | -     | -     | -     |
| 39.09    | Octadecanoic acid, 2-propenyl ester        | 0.66                        | 2.87  | 2.39  | 0.77  | 2.09  | 2.95  |
| 39.332   | Hexadecanoic acid, propyl ester            | -                           | -     | -     | 0.32  | -     | -     |
| 40.816   | Undec-10-ynoic acid, decyl ester           | -                           | -     | 0.34  | -     | -     | -     |
| 40.826   | (E)-9-Octadecenoic acid ethyl ester        | -                           | -     | -     | 0.6   | -     | -     |
| 41.084   | Octadecanoic acid                          | 1.09                        | -     | -     | -     | -     | -     |
| 41.31    | Octadecanoic acid, ethyl ester             | -                           | -     | -     | -     | -     | 2.51  |
| 41.323   | Docosanoic acid, ethyl ester               | -                           | -     | -     | -     | 0.29  | -     |
| 42.351   | 9-Octadecenoic acid                        | 6.9                         | -     | -     | 0.29  | -     | -     |
| 42.353   | Erucic acid                                | -                           | -     | -     | -     | 0.41  | -     |
| 42.381   | Undec-10-ynoic acid, dodecyl ester         | 0.11                        | -     | -     | -     | -     | -     |
| 42.606   | cis-9-Octadecenoic acid, propyl ester      | -                           | -     | -     | 0.22  | -     | -     |
| 44.182   | 2-Tridecenoic acid, (E)-                   | -                           | -     | -     | -     | 0.51  | 0.43  |
| 44.222   | trans-2-Dodecenoic acid                    | 0.17                        | 0.52  | 0.6   | 0.39  | -     | -     |
| 45.961   | Dodecanoic acid, cyclohexyl ester          | 0.07                        | -     | -     | -     | -     | -     |

|        |                                                                 |      |      |      |      |      |      |
|--------|-----------------------------------------------------------------|------|------|------|------|------|------|
| 46.278 | Hexadecanoic acid, (2,2-dimethyl-1,3-dioxolan-4-yl)methyl ester | 0.21 | -    | -    | -    | -    | -    |
| 46.478 | Hexadecanoic acid, 1-(hydroxymethyl)-1,2-ethanediyl ester       | -    | -    | 0.71 | -    | -    | -    |
| 6.49   | Hexadecanoic acid, 2-hydroxy-1-(hydroxymethyl)ethyl ester       | -    | -    | -    | 0.58 | -    | 0.47 |
| 46.496 | Hexadecanoic acid, 1-(hydroxymethyl)-1,2-ethanediyl ester       | 0.35 | 0.97 | -    | -    | 0.38 | -    |
| 49.496 | Octadecanoic acid, (2,2-dimethyl-1,3-dioxolan-4-yl)methyl ester | 0.06 | -    | -    | -    | -    | -    |
| 55.797 | Dodecanoic acid, 1,2,3-propanetriyl ester                       | -    | 2.42 | -    | -    | -    | -    |

\* Compounds with match factor scores, between observed and reference mass spectrum, greater than or equal to 75% were assigned as identified compounds.

<sup>a</sup> The labeling rule is the “abbreviation of biocrude” + “recycle times”.

**Table S8.** Elemental analyses of the GTW and hydrochar samples obtained in this study (mean  $\pm$  SD).

|             | <b>C</b>       | <b>H</b>       | <b>N</b>      | <b>Ash</b>     | <b>O</b>       | <b>HHV</b>     |
|-------------|----------------|----------------|---------------|----------------|----------------|----------------|
| <b>GTW</b>  | 67.2 $\pm$ 0.7 | 11.0 $\pm$ 0.2 | 3.3 $\pm$ 0.5 | 2.9 $\pm$ 0.1  | 15.6 $\pm$ 0.5 | 34.7 $\pm$ 0.5 |
| <b>HC-0</b> | 33.2 $\pm$ 0.2 | 3.0 $\pm$ 0.0  | 2.6 $\pm$ 0.0 | 53.9 $\pm$ 0.0 | 7.3 $\pm$ 0.2  | 13.1 $\pm$ 0.1 |
| <b>HC-1</b> | 31.8 $\pm$ 0.5 | 2.9 $\pm$ 0.1  | 2.6 $\pm$ 0.1 | 53.8 $\pm$ 4.7 | 9.0 $\pm$ 0.3  | 12.9 $\pm$ 0.2 |
| <b>HC-2</b> | 30.5 $\pm$ 0.3 | 2.7 $\pm$ 0.1  | 2.5 $\pm$ 0.1 | 52.5 $\pm$ 4.5 | 11.8 $\pm$ 0.5 | 12.6 $\pm$ 0.3 |
| <b>HC-3</b> | 31.2 $\pm$ 0.4 | 2.6 $\pm$ 0.1  | 2.2 $\pm$ 0.1 | 51.5 $\pm$ 0.6 | 12.5 $\pm$ 0.5 | 12.7 $\pm$ 0.3 |
| <b>HC-4</b> | 28.6 $\pm$ 1.4 | 2.4 $\pm$ 0.3  | 2.0 $\pm$ 0.2 | 56.1 $\pm$ 0.0 | 10.9 $\pm$ 1.0 | 11.7 $\pm$ 0.4 |
| <b>HC-5</b> | 29.9 $\pm$ 0.3 | 2.6 $\pm$ 0.0  | 2.1 $\pm$ 0.0 | 52.7 $\pm$ 3.9 | 12.7 $\pm$ 0.2 | 12.2 $\pm$ 0.2 |

**Table S9.** Physicochemical characterization of the BMP digestate after treating aqueous phases (mean  $\pm$  SD).

|                                       | AP-0             | AP-1            | AP-2            | AP-3            | AP-4            | AP-5             |
|---------------------------------------|------------------|-----------------|-----------------|-----------------|-----------------|------------------|
| pH                                    | 8.22 $\pm$ 0.04  | 8.21 $\pm$ 0.03 | 8.22 $\pm$ 0.03 | 8.22 $\pm$ 0.02 | 8.24 $\pm$ 0.04 | 8.23 $\pm$ 0.05  |
| TAN (mg N L <sup>-1</sup> )           | 251.5 $\pm$ 0.5  | 233.1 $\pm$ 2.2 | 279.3 $\pm$ 4.5 | 269.0 $\pm$ 6.2 | 339.0 $\pm$ 1.0 | 368.7 $\pm$ 15.9 |
| Total VFA (mg COD L <sup>-1</sup> )   | 141.2 $\pm$ 13.4 | 63.8 $\pm$ 0.9  | 317.2 $\pm$ 4.2 | 190.4 $\pm$ 5.9 | 858.4 $\pm$ 6.1 | 412.9 $\pm$ 7.7  |
| Acetate (mg COD L <sup>-1</sup> )     | 74.4 $\pm$ 4.2   | 25.4 $\pm$ 0.3  | 239.3 $\pm$ 0.8 | 161.3 $\pm$ 5.3 | 475.4 $\pm$ 4.7 | 324.6 $\pm$ 7.3  |
| Propionate (mg COD L <sup>-1</sup> )  | 20.9 $\pm$ 4.5   | 12.4 $\pm$ 0.1  | 77.9 $\pm$ 4.9  | 13.7 $\pm$ 0.4  | 317.6 $\pm$ 2.9 | 88.3 $\pm$ 5.7   |
| Isobutyrate (mg COD L <sup>-1</sup> ) | 10.6 $\pm$ 4.6   | 4.0 $\pm$ 0.2   | ND              | 5.2 $\pm$ 0.5   | 24.9 $\pm$ 1.9  | ND               |

TAN: total ammonia nitrogen; VFA: volatile fatty acids; ND: not detected

**Table S10.** Kinetic parameters of the modified Gompertz model for the different AP samples.

| <b>Aqueous Phase</b>            | <b>AP-0 <sup>a</sup></b> | <b>AP-1</b> | <b>AP-2</b> | <b>AP-3</b> | <b>AP-4</b> | <b>AP-5</b> |
|---------------------------------|--------------------------|-------------|-------------|-------------|-------------|-------------|
| <b>P (mL/g COD)</b>             | 223.3                    | 225.5       | 245.1       | 234.0       | 156.3       | 196.3       |
| <b>Rm (mL/g COD/d)</b>          | 17.9                     | 13.7        | 11.7        | 9.4         | 8.2         | 8.2         |
| <b><math>\lambda</math> (d)</b> | 8.3                      | 5.2         | 8.4         | 7.1         | 9.3         | 9.2         |
| <b>R<sup>2</sup></b>            | 0.995                    | 0.998       | 0.997       | 0.994       | 0.989       | 0.994       |

P: maximum biogas production; Rm: maximum biomethane production rate;  $\lambda$ : lag time; R<sup>2</sup>: coefficient of determination.

<sup>a</sup> The labeling rule is the abbreviation of “Aqueous Phase” + “recycle times”.

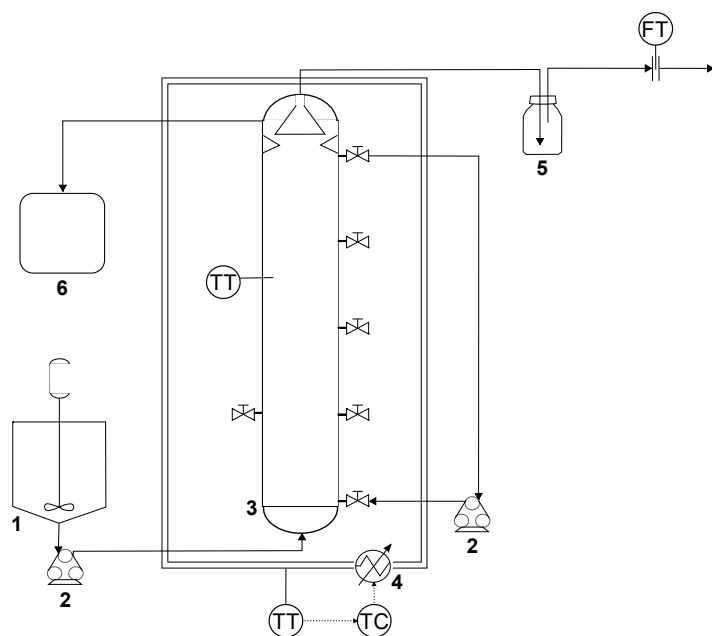

**Figure S1.** Diagram of the bench scale EGSB reactor used in this study

Substrate was constantly stirred and kept at 4 °C (1). A peristaltic pump (2) continuously fed the substrate to the reactor to maintain uniform flow.

The EGSB reactor (3) was made of polycarbonate with an inner diameter of 6 cm and a total height of 31 cm, height of digestion zone was 28.3 cm, having a capacity of 0.8 L. Three sampling ports were installed along the height of the reactor for taking samples for SMA test. The inlet was located at the bottom of the reactor. A holed piece was placed 5 cm from the bottom for dispersion of the inflow. A three-phase separator was located in the upper portion of the reactor for separating solid, liquid, and gas. Deflectors were projected horizontally, and the inverted funnel was fitted on the top of the reactor for biogas collection. The reactor was placed in a polycarbonate box equipped with 4 negative temperature coefficient (NTC) thermistors connected to a temperature controller (4). Additionally, there was one NTC thermistor installed inside the reactor to ensure a precise temperature of  $37 \pm 0.1$  °C was maintained within the reactor. The biogas was passed through a CO<sub>2</sub> washing solution (5) and then to a gas counter (RITTER MilliGascounter type MGC-1) for the volumetric measurement of produced methane. The effluent was collected in the effluent tank (6).

The reactor was seeded with anaerobic granules from an internal circulation reactor that treats brewery wastewater, filling about 30% of the reactor volume. In the inoculum sludge, total solids, total suspended solids, and volatile suspended solids were 325.64, 312.04, and 301.80 g/L, respectively. The sludge was retained in the EGSB reactor during the experiment. The flow rate of the inflow was maintained at 1.193 L d<sup>-1</sup> for the whole study, while the recirculation flow rate was kept to 24.225 L d<sup>-1</sup>.

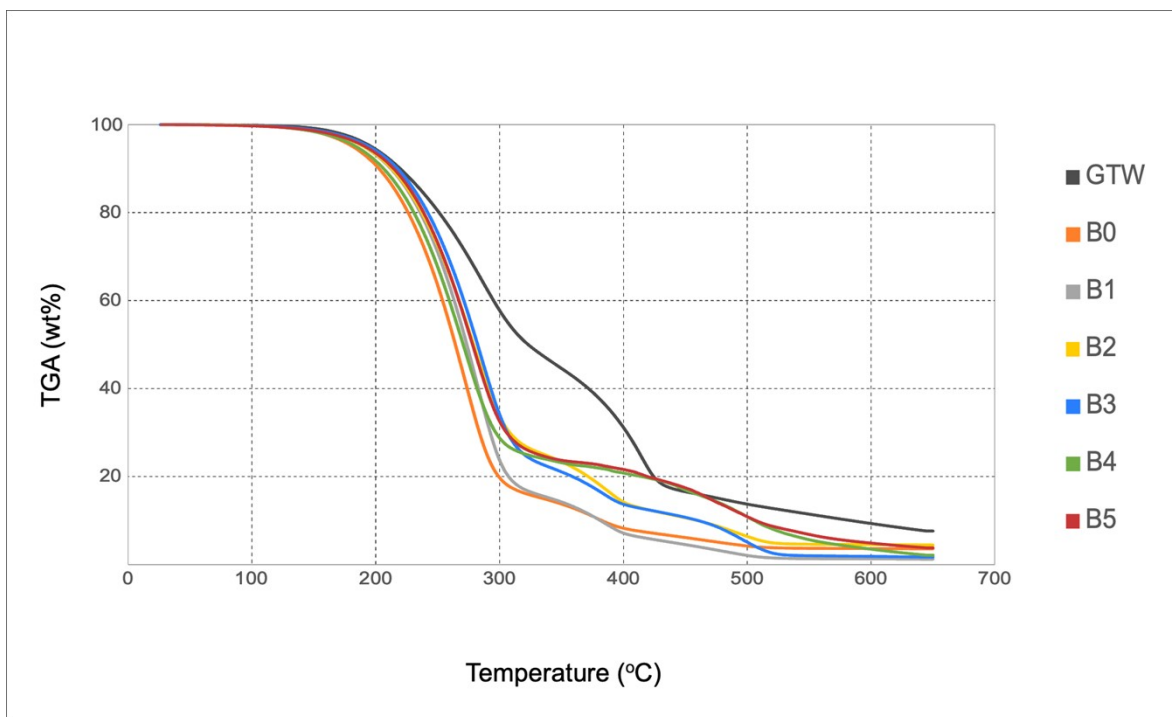

**Figure S2.** TGA analysis of the grease trap waste (GTW) and biocrudes. The labeling rule is the abbreviation of “biocrude” + “recycle times”.

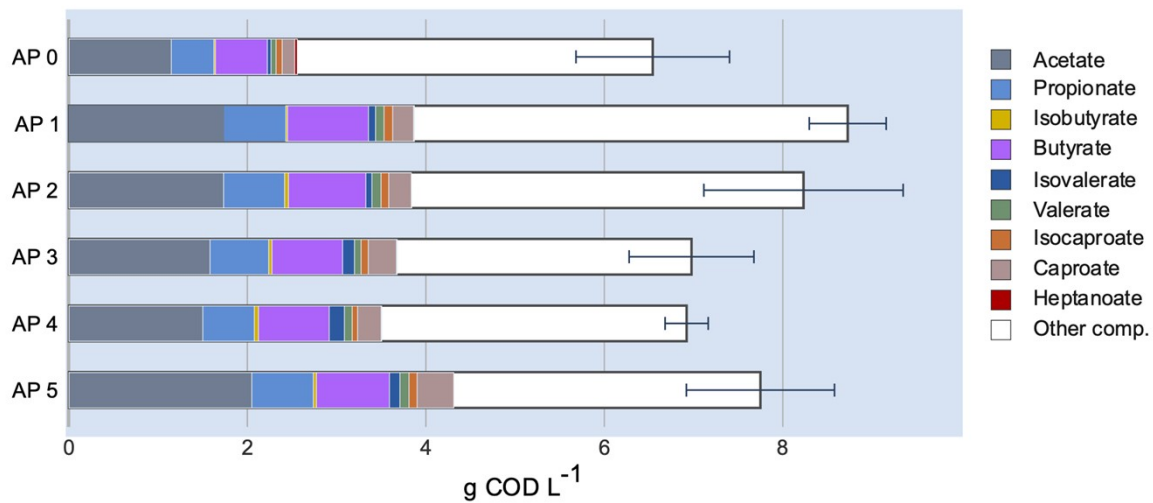

**Fig. S3.** Concentration of volatile fatty acids (g COD L<sup>-1</sup>) characterized in the different APs. Bars are balanced with the total COD concentration of the sample.

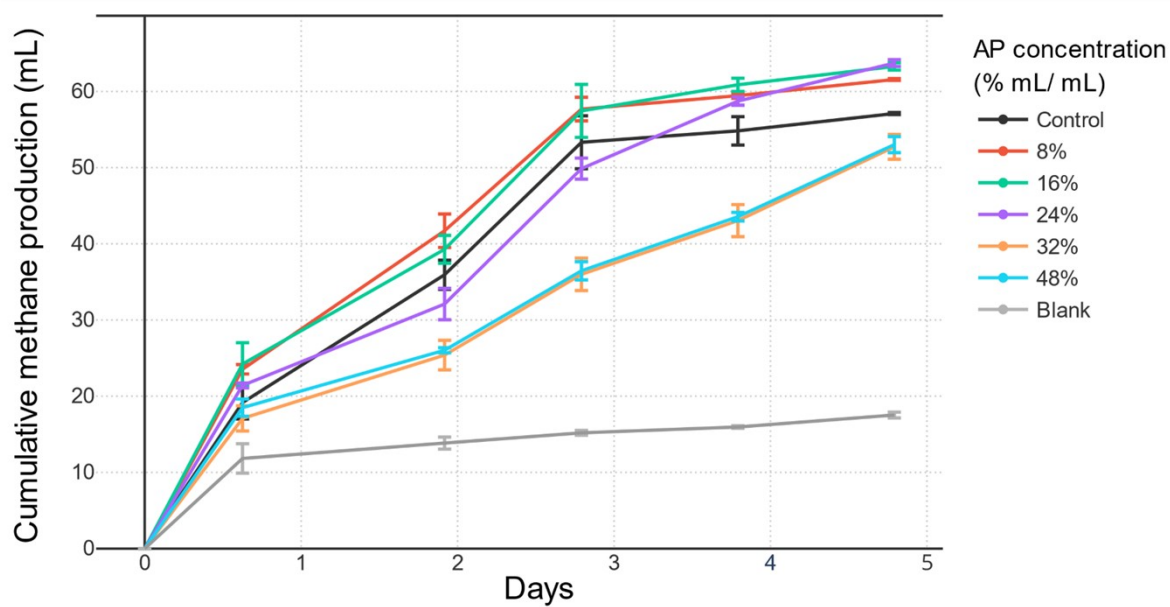

**Figure S4.** Cumulative methane production (mL) at increasing AP concentrations (i.e., 8, 16, 24, 32, and 48% v/v) following anaerobic toxicity assays (ATA).

## References

- 1 APHA/AWWA/WEF, *Stand. Methods*, 2012, 541.
- 2 R. A. Labatut, L. T. Angenent and N. R. Scott, *Bioresour. Technol.*, 2011, **102**, 2255–2264.
- 3 W. F. Owen, D. C. Stuckey, J. B. Healy, L. Y. Young and P. L. McCarty, *Water Res.*, 1979, **13**, 485–492.
- 4 I. Angelidaki, L. Borzacconi, S. Kalyuzhnyi, A. J. Guwy, J. B. van Lier, M. Alves, D. Bolzonella, J. L. Campos and P. Jenicek, *Water Sci. Technol.*, 2009, **59**, 927–934.
- 5 R. E. Speece, *Environ. Sci. Technol.*, 1983, **17**, 416A-427A.
